# Supplementary material for: Deleterious role of hepatitis B virus infection in therapeutic response among patients with rheumatoid arthritis in a clinical practice setting: a case-control study
Source: PubMed Central journal article supplement (PMC5932798; doi:10.1186/s13075-018-1548-5), 2018-05-02
Supplement: 13075_2018_1548_MOESM1_ESM.pdf [file 13075_2018_1548_MOESM1_ESM.pdf]

A

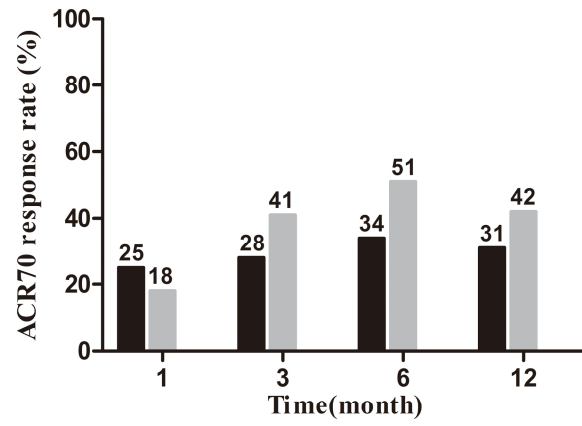

B

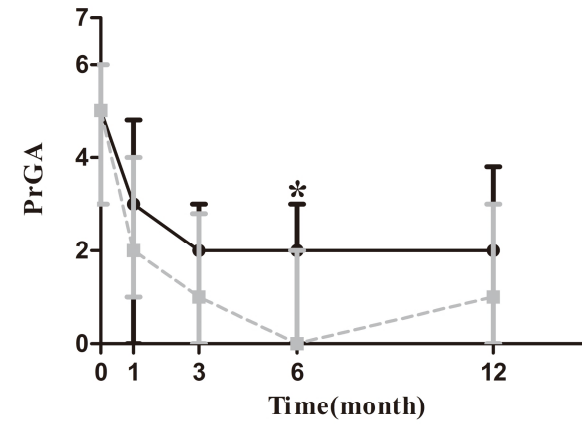

C

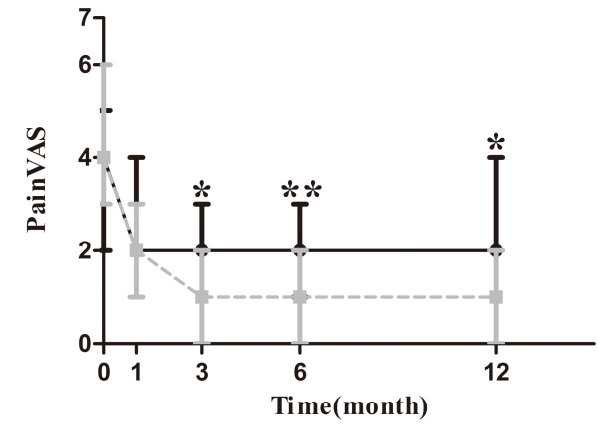

D

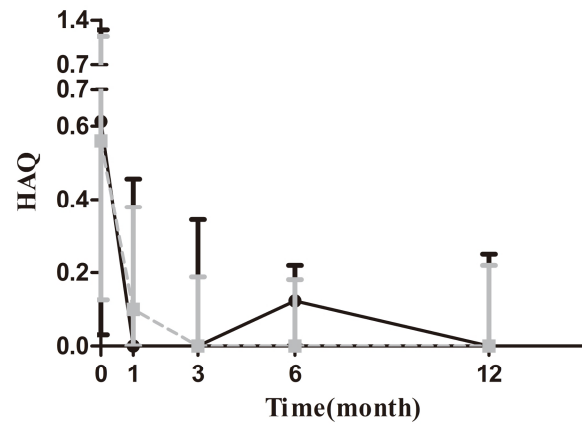

E

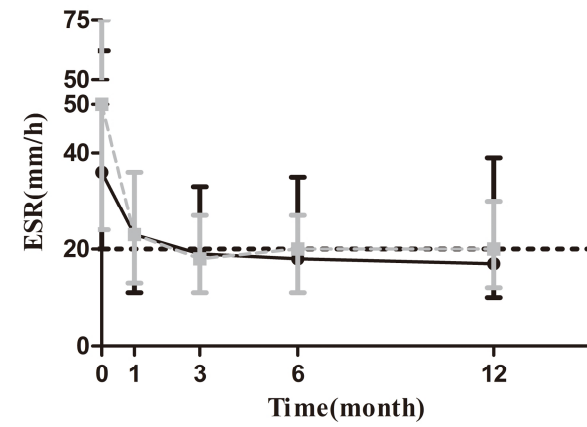

F

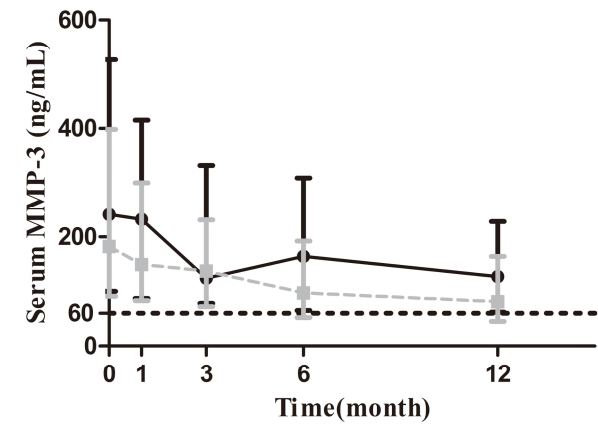

■ / ● CHB group

■ / ● Non-CHB group
