# Supplementary material for: Deleterious role of hepatitis B virus infection in therapeutic response among patients with rheumatoid arthritis in a clinical practice setting: a case-control study
Source: PubMed Central journal article supplement (PMC5932798; doi:10.1186/s13075-018-1548-5), 2018-05-02

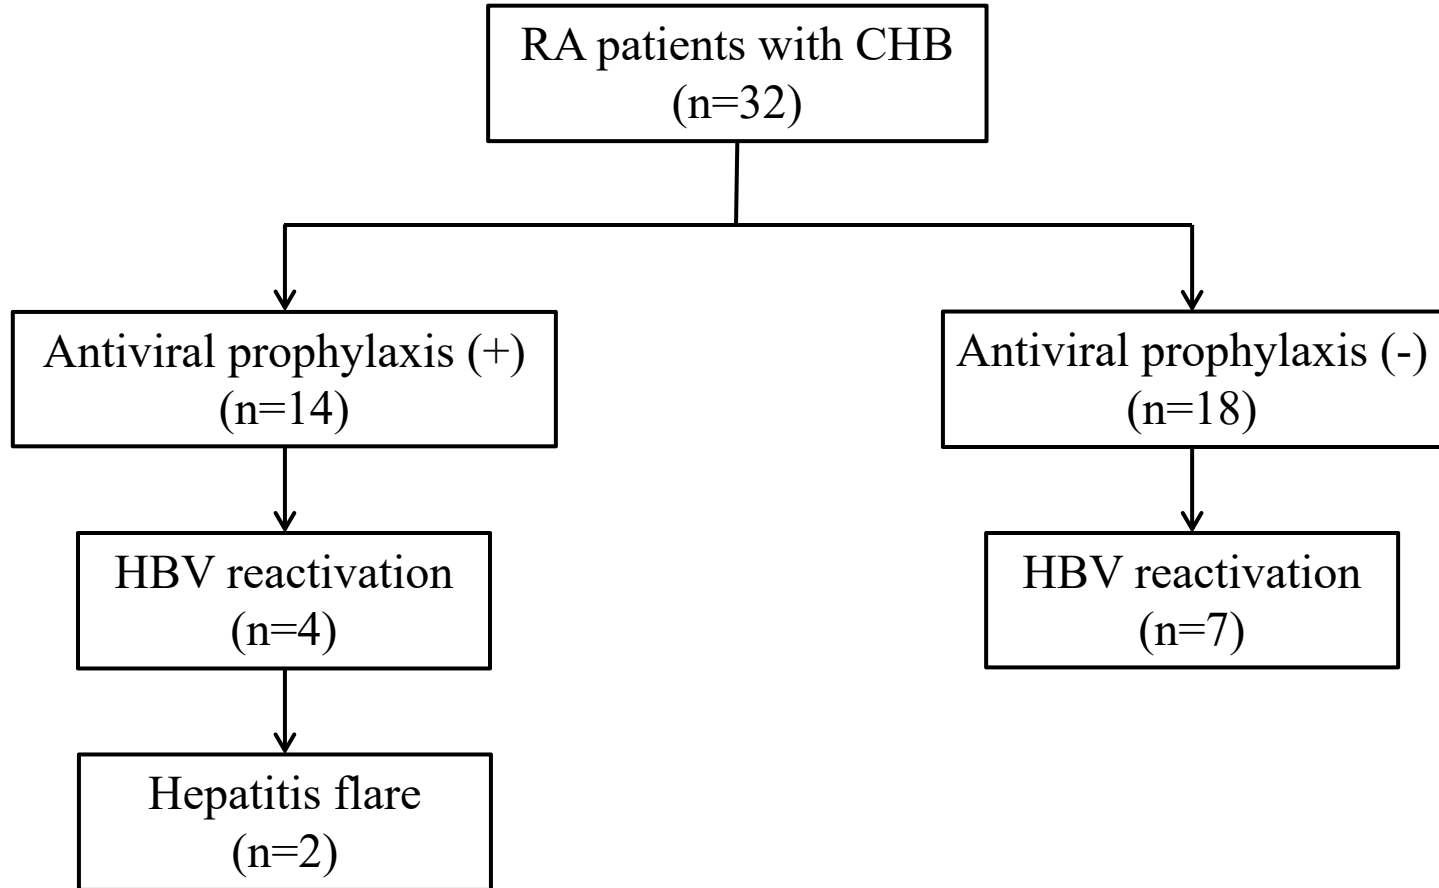

Supplement: 13075_2018_1548_MOESM2_ESM.pdf [file 13075_2018_1548_MOESM2_ESM.pdf]
